# Supplementary material
Source: PubMed Central journal article supplement (PMC5358098)

**SUPPLEMENTAL INFORMATION**

**Table S1. Transduction coefficients and relative activity for GAT100, Org27569, and PSNCBAM-1.**

| Cell model | Orthosteric ligand | Allosteric ligand | $\beta$ -arrestin1 |                | pPLC $\beta$ 3 |                | pERK1/2       |                | cAMP          |                |
|------------|--------------------|-------------------|--------------------|----------------|----------------|----------------|---------------|----------------|---------------|----------------|
|            |                    |                   | LogR               | $\Delta$ LogR  | LogR           | $\Delta$ LogR  | LogR          | $\Delta$ LogR  | LogR          | $\Delta$ LogR  |
| HEK293A    | 2-AG               | GAT100            | 7.9 $\pm$ 0.2      | 0.0 $\pm$ 0.2  | 7.2 $\pm$ 0.1  | 0.0 $\pm$ 0.1  | 7.1 $\pm$ 0.1 | 0.0 $\pm$ 0.1  | 6.8 $\pm$ 0.1 | 0.0 $\pm$ 0.1  |
|            |                    | Org27569          | 4.0 $\pm$ 0.4      | -3.9 $\pm$ 0.4 | 4.3 $\pm$ 0.9  | -2.9 $\pm$ 0.9 | 4.3 $\pm$ 0.1 | 2.2 $\pm$ 0.1  | 3.5 $\pm$ 0.8 | -3.3 $\pm$ 0.8 |
|            |                    | PSNCBAM-1         | 4.9 $\pm$ 0.4      | -3.0 $\pm$ 0.4 | 5.5 $\pm$ 0.7  | -1.7 $\pm$ 0.7 | 4.8 $\pm$ 0.2 | 2.7 $\pm$ 0.2  | 4.0 $\pm$ 0.5 | -2.8 $\pm$ 0.5 |
|            | AEA                | GAT100            | 7.3 $\pm$ 0.2      | -0.6 $\pm$ 0.2 | 7.8 $\pm$ 0.8  | 0.6 $\pm$ 0.8  | 7.1 $\pm$ 0.1 | 0.0 $\pm$ 0.1  | 6.3 $\pm$ 0.1 | -0.5 $\pm$ 0.1 |
|            |                    | Org27569          | 6.1 $\pm$ 0.4      | -1.8 $\pm$ 0.4 | 7.0 $\pm$ 0.6  | -0.2 $\pm$ 0.6 | 4.1 $\pm$ 0.8 | -3.0 $\pm$ 0.8 | 6.2 $\pm$ 0.6 | -0.6 $\pm$ 0.6 |
|            |                    | PSNCBAM-1         | 6.2 $\pm$ 0.2      | -1.7 $\pm$ 0.8 | 7.2 $\pm$ 0.2  | 0.0 $\pm$ 0.2  | 6.6 $\pm$ 0.2 | -0.5 $\pm$ 0.2 | 4.4 $\pm$ 0.7 | -2.4 $\pm$ 0.7 |
|            | CP55,940           | GAT100            | 7.6 $\pm$ 0.1      | -0.3 $\pm$ 0.1 | 7.1 $\pm$ 0.1  | -0.1 $\pm$ 0.1 | 7.0 $\pm$ 0.1 | -1.0 $\pm$ 0.1 | 6.4 $\pm$ 0.1 | -0.4 $\pm$ 0.1 |
|            |                    | Org27569          | 7.7 $\pm$ 0.5      | -0.2 $\pm$ 0.5 | 7.3 $\pm$ 0.1  | 0.1 $\pm$ 0.1  | 6.3 $\pm$ 0.4 | -0.8 $\pm$ 0.4 | 6.6 $\pm$ 0.6 | -0.2 $\pm$ 0.6 |
|            |                    | PSNCBAM-1         | 6.7 $\pm$ 0.7      | -1.2 $\pm$ 0.7 | 7.5 $\pm$ 0.5  | 0.3 $\pm$ 0.5  | 6.6 $\pm$ 0.6 | -0.5 $\pm$ 0.6 | 6.7 $\pm$ 0.6 | -0.1 $\pm$ 0.6 |
| Neuro2a    | 2-AG               | GAT100            | 6.9 $\pm$ 0.3      | 0.0 $\pm$ 0.3  | 7.3 $\pm$ 0.1  | 0.0 $\pm$ 0.1  | 7.1 $\pm$ 0.1 | 0.0 $\pm$ 0.1  | -             | -              |
|            |                    | Org27569          | 6.8 $\pm$ 0.6      | -0.1 $\pm$ 0.6 | 7.4 $\pm$ 0.2  | 0.1 $\pm$ 0.2  | 6.5 $\pm$ 0.2 | -0.6 $\pm$ 0.2 | -             | -              |
|            |                    | PSNCBAM-1         | 6.9 $\pm$ 0.9      | 0.0 $\pm$ 0.9  | 6.3 $\pm$ 0.5  | -1.0 $\pm$ 0.5 | 6.6 $\pm$ 0.4 | -0.5 $\pm$ 0.4 | -             | -              |
|            | AEA                | GAT100            | 7.9 $\pm$ 0.2      | 1.0 $\pm$ 0.2  | 7.1 $\pm$ 0.1  | -0.2 $\pm$ 0.1 | 7.2 $\pm$ 0.1 | 0.1 $\pm$ 0.1  | -             | -              |
|            |                    | Org27569          | 6.8 $\pm$ 0.4      | -0.1 $\pm$ 0.4 | 6.6 $\pm$ 0.2  | -0.7 $\pm$ 0.2 | 6.8 $\pm$ 0.2 | -0.3 $\pm$ 0.2 | -             | -              |
|            |                    | PSNCBAM-1         | 6.7 $\pm$ 0.3      | -0.2 $\pm$ 0.3 | 6.4 $\pm$ 0.7  | -0.9 $\pm$ 0.7 | 7.0 $\pm$ 0.4 | -1.0 $\pm$ 0.4 | -             | -              |
|            | CP55,940           | GAT100            | 8.0 $\pm$ 0.1      | 1.1 $\pm$ 0.1  | 7.9 $\pm$ 0.2  | 0.6 $\pm$ 0.2  | 7.2 $\pm$ 0.1 | 0.1 $\pm$ 0.1  | -             | -              |
|            |                    | Org27569          | 7.2 $\pm$ 0.8      | 0.3 $\pm$ 0.8  | 7.0 $\pm$ 0.4  | -0.3 $\pm$ 0.4 | 6.9 $\pm$ 0.9 | -0.2 $\pm$ 0.9 | -             | -              |
|            |                    | PSNCBAM-1         | 8.0 $\pm$ 0.2      | 1.1 $\pm$ 0.2  | 8.9 $\pm$ 0.2  | 1.6 $\pm$ 0.2  | 8.3 $\pm$ 0.9 | 1.2 $\pm$ 0.9  | -             | -              |

**Table S1 Continued. Transduction coefficients and relative activity for GAT100, Org27569, and PSNCBAM-1.**

| Cell model                    | Orthosteric ligand | Allosteric ligand | $\beta$ -arrestin1 |                | pPLC $\beta$ 3 |                | pERK1/2       |                | cAMP |               |
|-------------------------------|--------------------|-------------------|--------------------|----------------|----------------|----------------|---------------|----------------|------|---------------|
|                               |                    |                   | LogR               | $\Delta$ LogR  | LogR           | $\Delta$ LogR  | LogR          | $\Delta$ LogR  | LogR | $\Delta$ LogR |
| <i>STHdh</i> <sup>Q7/Q7</sup> | 2-AG               | GAT100            | 8.0 $\pm$ 1.0      | 0.0 $\pm$ 1.0  | 7.3 $\pm$ 0.1  | 0.0 $\pm$ 0.1  | 7.2 $\pm$ 0.1 | 0.0 $\pm$ 0.1  | -    | -             |
|                               |                    | Org27569          | 7.9 $\pm$ 0.6      | -0.1 $\pm$ 0.6 | 8.5 $\pm$ 0.7  | 0.5 $\pm$ 0.7  | 7.4 $\pm$ 0.6 | 0.2 $\pm$ 0.6  | -    | -             |
|                               |                    | PSNCBAM-1         | 7.8 $\pm$ 0.2      | -0.2 $\pm$ 0.2 | 7.2 $\pm$ 0.2  | -0.8 $\pm$ 0.2 | 7.0 $\pm$ 0.3 | -0.2 $\pm$ 0.3 | -    | -             |
|                               | AEA                | GAT100            | 8.0 $\pm$ 0.7      | 0.0 $\pm$ 0.7  | 7.1 $\pm$ 0.1  | -0.9 $\pm$ 0.1 | 7.1 $\pm$ 0.1 | -0.1 $\pm$ 0.1 | -    | -             |
|                               |                    | Org27569          | 7.2 $\pm$ 0.2      | -0.8 $\pm$ 1.1 | 7.9 $\pm$ 0.6  | -0.1 $\pm$ 0.6 | 6.3 $\pm$ 0.9 | -0.9 $\pm$ 0.9 | -    | -             |
|                               |                    | PSNCBAM-1         | 7.8 $\pm$ 0.6      | -0.2 $\pm$ 0.6 | 7.3 $\pm$ 0.5  | -0.7 $\pm$ 0.5 | 6.8 $\pm$ 0.2 | -0.4 $\pm$ 0.2 | -    | -             |
|                               | CP55,940           | GAT100            | 7.9 $\pm$ 0.1      | -0.1 $\pm$ 0.1 | 7.2 $\pm$ 0.1  | -0.8 $\pm$ 0.1 | 7.3 $\pm$ 0.1 | 1.0 $\pm$ 0.1  | -    | -             |
|                               |                    | Org27569          | 7.3 $\pm$ 0.3      | -0.7 $\pm$ 0.3 | 7.4 $\pm$ 0.6  | -0.6 $\pm$ 0.6 | 7.0 $\pm$ 0.3 | -0.2 $\pm$ 0.3 | -    | -             |
|                               |                    | PSNCBAM-1         | 7.7 $\pm$ 0.7      | -0.3 $\pm$ 0.7 | 7.3 $\pm$ 0.2  | -0.7 $\pm$ 0.2 | 6.8 $\pm$ 0.3 | -0.4 $\pm$ 0.3 | -    | -             |

LogR and  $\Delta$ LogR determined using operational model analysis as described in Materials and Methods (eq. 1 - 3). Calculations are from data presented in figures 3 ( $\beta$ -arrestin1), 5 (pPLC $\beta$ 3), 7 (pERK1/2), and 9 (cAMP) in cells treated with 500 nM orthosteric agonist + 1 nM - 10  $\mu$ M allosteric modulator.  $\Delta$ LogR for GAT100 compared with Org27569 and PSNCBAM-1. Data are mean  $\pm$  SEM from at least four independent experiments. *N* = 4.

**Table S2. Ligand/Receptor Interaction Energies for GAT100\*\***

| Residues | Electrostatic<br>(kcal/mol) | Van der Waals<br>(kcal/mol) | Total Energy<br>(kcal/mol) |
|----------|-----------------------------|-----------------------------|----------------------------|
| CP55,940 | 0.26                        | -2.34                       | -2.08                      |
| Q1.32    | 0.05                        | -0.32                       | -0.27                      |
| D(184)   | -0.80                       | -2.06                       | -2.86                      |
| S(185)   | 0.00                        | -0.11                       | -0.11                      |
| F3.25    | -0.23                       | -1.94                       | -2.17                      |
| L3.29    | -0.04                       | -0.21                       | -0.25                      |
| F(268)   | -0.40                       | -5.03                       | <b>-5.44</b>               |
| P(269)   | -1.11                       | -3.77                       | <b>-4.88</b>               |
| H(270)   | 0.14                        | -0.25                       | -0.11                      |
| I(271)   | 0.03                        | -0.20                       | -0.18                      |
| P6.50    | 0.26                        | -0.33                       | -0.07                      |
| L6.51    | 0.65                        | -3.26                       | -2.61                      |
| L6.52    | -0.08                       | -0.18                       | -0.26                      |
| I6.54    | -0.39                       | -4.22                       | <b>-4.61</b>               |
| M6.55    | 0.68                        | -1.68                       | -0.99                      |
| D6.58    | -2.40                       | -2.49                       | <b>-4.89</b>               |
| M(371)   | 0.01                        | -0.56                       | -0.55                      |
| K(373)   | 0.66                        | -0.22                       | 0.44                       |
| K(376)   | 0.70                        | -1.23                       | -0.52                      |
| V7.34    | -0.47                       | -1.22                       | -1.69                      |
| F7.35    | -0.55                       | -6.53                       | <b>-7.09</b>               |
|          | <b>-3.1</b>                 | <b>-38.1</b>                | <b>-41.2</b>               |

\*\*Interaction energies equal to -3.0 kcal/mol or better are shown in bold

**Table S3. Ligand/Receptor Interaction Energies for CP55,940\*\***

| Residues | Electrostatic | Van der Waals | Total Energy  |
|----------|---------------|---------------|---------------|
|          | (kcal/mol)    | (kcal/mol)    | (kcal/mol)    |
| GAT100   | 0.26          | -2.34         | -2.08         |
| Q1.32    | -2.73         | -2.16         | <b>-4.89</b>  |
| L1.33    | -0.14         | -0.23         | -0.37         |
| I1.35    | 0.00          | -0.55         | -0.55         |
| A1.36    | 1.06          | -2.00         | -0.93         |
| S1.39    | 0.07          | -2.14         | -2.07         |
| L1.30    | -0.02         | -1.62         | -1.64         |
| G1.43    | 0.09          | -0.28         | -0.19         |
| I2.56    | 0.17          | -2.18         | -2.01         |
| F2.57    | 0.09          | -3.13         | <b>-3.04</b>  |
| S2.60    | 0.18          | -1.59         | -1.40         |
| D2.63    | 1.27          | -0.30         | 0.96          |
| F2.64    | -0.19         | -3.36         | <b>-3.55</b>  |
| F3.25    | -0.18         | -4.53         | <b>-4.71</b>  |
| K3.28    | -13.05        | -0.36         | <b>-13.40</b> |
| L3.29    | -0.12         | -0.27         | -0.39         |
| G3.31    | -0.07         | -0.17         | -0.24         |
| V3.32    | -0.05         | -2.25         | -2.30         |
| S3.35    | -0.08         | -1.01         | -1.10         |
| F3.36    | 0.03          | -1.02         | -1.00         |
| K(373)   | 0.36          | -0.51         | -0.15         |
| T7.33    | -0.02         | -0.25         | -0.27         |
| F7.35    | -0.05         | -1.61         | -1.66         |
| A7.36    | -0.77         | -2.38         | <b>-3.15</b>  |
| S7.39    | -0.91         | -2.20         | <b>-3.10</b>  |
| M7.40    | 0.00          | -0.26         | -0.26         |
| C7.42    | 0.03          | -1.90         | -1.87         |
| L7.43    | 0.03          | -4.51         | <b>-4.48</b>  |
| L7.44    | 0.00          | -0.17         | -0.17         |
| N7.45    | 0.03          | -0.84         | -0.81         |
| S7.46    | 0.05          | -1.02         | -0.97         |
| T7.47    | 0.00          | -0.04         | -0.04         |
|          | <b>-14.6</b>  | <b>-47.2</b>  | <b>-61.8</b>  |

\*\*Interaction energies equal to -3.0 kcal/mol or better are shown in bold

Figure S1. The RMSD of the transmembrane residues of CB1 relative to the initial model in the equilibration run. The CB1 receptor conformation at 70ns was extracted and used for ligand docking studies.

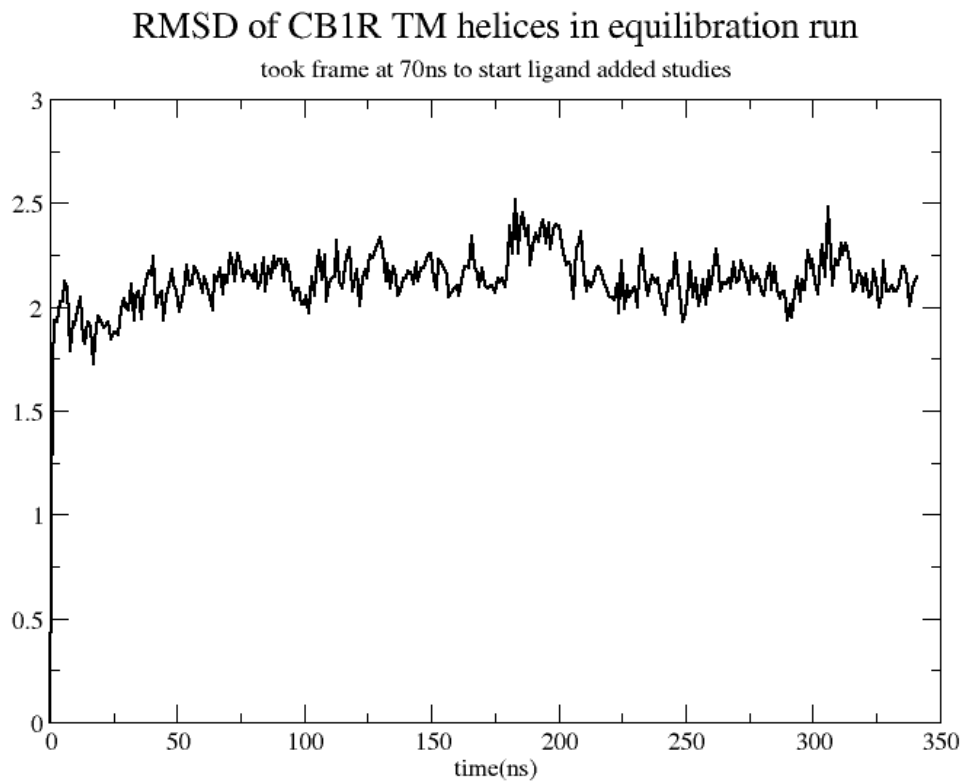

Figure S2. An overlay is presented here of the ORG27569 global minimum energy conformation (cyan) and the docked conformation of GAT100 (purple) illustrated in Figure 2.

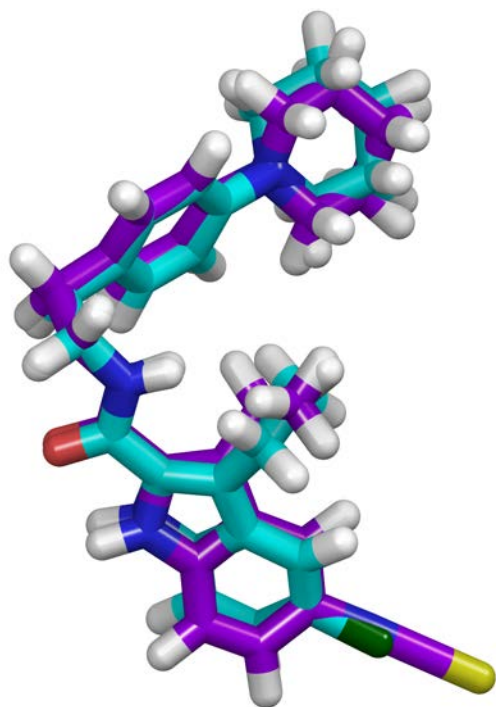

Supplement: NIHMS849726-supplement-Supplemental.pdf [file NIHMS849726-supplement-Supplemental.pdf]
